## **An epigenomic shift in amygdala marks the transition to maternal behaviors in alloparenting virgin female mice**

\*Christopher H. Seward<sup>1,2</sup>, \*Michael C. Saul<sup>2,4</sup>, Joseph M. Troy<sup>2</sup>, Payam Dibaieinia<sup>3</sup>, Huimin Zhang<sup>2</sup>, Saurabh Sinha<sup>2,3</sup> and Lisa J. Stubbs<sup>1,2,5</sup>

<sup>1</sup>Pacific Northwest Research Institute, Seattle, WA 98122,

<sup>2</sup> Carl R. Woese Institute for Genomic Biology, and <sup>3</sup>Department of Computer Science, University of Illinois at Urbana-Champaign, Urbana IL 61801

<sup>4</sup> Current address: The Jackson Laboratory, Bar Harbor, ME 04609

<sup>5</sup> Corresponding author, [lstubbs@pnri.org](mailto:lstubbs@pnri.org)

\*These authors contributed equally

1 **ABSTRACT**

2           In many species, adults care for young offspring that are not their own, a phenomenon  
3 called alloparenting. However, most nonparental adults must be sensitized by repeated or  
4 extended exposures to newborns before they will robustly display parental-like behaviors. To  
5 capture neurogenomic events underlying the transition to active parental caring behaviors, we  
6 analyzed brain gene expression and chromatin profiles of virgin female mice co-housed with  
7 mothers during pregnancy and after birth. After an initial display of antagonistic behaviors and a  
8 surge of defense-related gene expression, we observed a dramatic shift in the chromatin  
9 landscape specifically in amygdala of the pup-exposed virgin females, accompanied by a  
10 dampening of anxiety-related gene expression. This epigenetic shift coincided with  
11 hypothalamic expression of the oxytocin gene and the emergence of behaviors and gene  
12 expression patterns classically associated with maternal care. The results outline a neurogenomic  
13 program associated with dramatic behavioral changes and suggest molecular networks relevant  
14 to human postpartum mental health.

## 15 INTRODUCTION

16 Interactions between newborn animals and their parents are profoundly important, being  
17 critical to the well-being of the offspring and intensely consequential to the parents as well. In  
18 most mammals, parental care is typically relegated to the female that bears the offspring, with  
19 hormonal shifts that occur during pregnancy and the early postpartum period priming her for this  
20 experience. These dramatic hormonal shifts also alter a mother's morphology, physiology, and  
21 brain structure in ways that persist far beyond the initial parenting experience [1,2]. In addition  
22 to these physical changes [3], mothering also alters a female's behavior, in both the immediate  
23 and the longer-term. In particular, the sight, sounds, and odors of newborns – which may  
24 otherwise be perceived as aversive by adults – become intensely rewarding and motivating to the  
25 mother [4–6]. As with other changes associated with parenting, the shift from aversion to  
26 intense affiliation and reward is coordinated by steroid hormones and a rapid surge in  
27 neuropeptide secretion around the time of birth [3]. Most significantly, a surge of oxytocin,  
28 stored during pregnancy within the paraventricular and supraoptic nuclei of the hypothalamus  
29 [7], is released to target neurons within a brain circuit central to fear, aversion, reward, and the  
30 evaluation of emotional salience [8].

31 New mothers are not the only individuals that can experience this switch to pup-  
32 affiliative behaviors. For example, although virgin female rats display a clearly aversive  
33 response to pup stimuli, this response can be overcome by the process of sensitization, which  
34 involves a series of repeated interactions; after sensitization, virgin rats will display robust  
35 maternal behaviors – hereafter referred to as maternal behaviors for simplicity – with pups [6].  
36 In contrast, adult virgin female mice do not display any obvious sign of aversion and will instead  
37 spontaneously display certain maternal behaviors shortly after given first access to young pups

38 [9,10]. Sensitization enhances this response; virgin female mice repeatedly exposed to pups  
39 significantly increases both the range and intensity of maternal behaviors [11]. Intriguingly, it  
40 has been shown virgin female mice continuously co-housed with new mothers will display  
41 maternal behaviors more rapidly under the instruction and encouragement of the mothers, a  
42 process that depends upon the activation of oxytocin neurons [12]. Like mothering itself, this  
43 experience of caring for young that are not one's own, or alloparenting, impacts future behavior.  
44 For example, juvenile female rats that have had the experience of "babysitting" younger siblings  
45 are highly motivated to display maternal behaviors in future encounters with pups [13], and  
46 sensitized adult virgin female mice demonstrate enhanced parenting skills when they have their  
47 offspring of their own [11,14,15]. Indeed, many of the mechanisms that reshape a mother's brain  
48 and behavior also appear to operate in alloparenting females, where intriguingly, they are  
49 activated without the hormonal priming stimulated by pregnancy, parturition, and nursing.

50       Here, we investigated the functional genomics profile of the brains of co-housed virgin  
51 female mice as they transitioned from pup-naïve to a robust display of alloparenting behaviors  
52 toward pups. To identify genes modulated during this transition, we examined alterations in gene  
53 expression in multiple brain regions over several days of continuous pup exposure. Because  
54 histone modifications have been implicated as central to the behavior of both new mothers and  
55 sensitized virgins [16], we also investigated chromatin accessibility profiles using H3K27Ac  
56 (histone H3 acetylated at lysine 27), a marker of open chromatin, in the same brain regions. The  
57 data reveal defense-related neurogenomic pathways that are silenced, and others that are  
58 activated, across the brains of co-housed alloparenting virgins as they transition to maternal  
59 behaviors and confirm an active role for chromatin remodeling in this behavioral switch,  
60 especially within the amygdala.

61 **RESULTS**

62 **Antagonistic behavior, followed by active nurturance in virgins co-housed with mothers**  
63 **and pups.**

64 In the most common version of rodent pup sensitization experiments, the pups are placed  
65 into the cage of a virgin female for short periods, then removed to be fed, repeatedly over the  
66 course of several consecutive days [11]. However, over years of mouse breeding, we had  
67 observed that nulliparous females co-housed with nursing mouse dams and their litters will  
68 display maternal behaviors toward the pups, suggesting a way to achieve more continuous,  
69 longer-term interaction. Indeed, a recent study has demonstrated that in this context, virgins  
70 respond more quickly to the pups as they are actively instructed and encouraged by the mothers  
71 [12]. This co-housing paradigm provided us with an excellent opportunity to measure the brain's  
72 functional genomic response to pups in the virgin females over time as they transition to  
73 maternal care. To document the timing of this transition, we co-housed four pairs of virgins and  
74 pregnant dams and filmed activity in the cages from early pregnancy through the fourth postnatal  
75 day (**File S1**; Files S1 and S2 available at <https://trackhub.pnri.org/stubbs/ucsc/public/allo.html>).  
76 For purposes of this study, we were primarily interested in the interactions between virgins and  
77 mothers, on the one hand, and virgins and pups on the other. Therefore, as a primary indicator  
78 of these interactions, we scored the virgins for pup-grooming and mother-grooming behaviors  
79 during 5-minute intervals at the top of each hour; summing the scores in each cage over 6-hour  
80 periods coordinated with the light/dark cycle, providing a useful summary of the overall  
81 behavioral patterns (**Table S1**). Throughout, the two females were most often found together,  
82 interacting or resting in the shared nest, and grooming each other regularly while awake  
83 throughout the observation period. In contrast, although the virgins began to investigate the pups

84 immediately after birth, they did not begin licking and grooming the pups consistently until  
85 around postnatal day 2 (P2), after which we increasingly observed the virgins engaged in pup  
86 licking/grooming behavior (**Fig. 1A; Table S1**). To test the hypothesis that pup-focused  
87 grooming increased for the virgins while mother-focused grooming did not, we selected data  
88 binned for 6 hours around 12:00 (the beginning of the dark period during lights-out) (**Fig. 1B**).  
89 Pup-focused grooming bouts significantly differed across days P1-P4 (repeated measures  
90 ANOVA,  $F_{3,9} = 9.91$ ,  $p = 0.003$ ), increasing over time, while mother-focused grooming bouts did  
91 not significantly differ across days P1-P4 ( $F_{3,9} = 0.67$ ,  $p = 0.59$ ).

92 We also observed additional behaviors that are worth noting here. For example, as  
93 described by Carcea and colleagues [12], we observed mothers steering virgin cagemates that  
94 had wandered off to feed or explore back to the nest; often this involved the mothers grabbing  
95 the virgins by the base of the tail and actively pushing them to the nest and pups. Afterward, the  
96 mother would herself typically leave the nest to feed, leaving the virgin to care for the pups. Not  
97 described in the published study but displayed by all virgins we recorded here, we also observed  
98 signs of early antagonism toward the pups. Specifically, during the first two postnatal days we  
99 observed the virgins grabbing pups in their mouths and actively tossing them or pushing them  
100 out of the shared nest (**Table S1, examples of both behaviors in File S2**). By P3, this behavior  
101 was no longer observed, as the virgins spent more time in the nests, licking and grooming the  
102 pups with increasing frequency in classic hunched or prone nursing postures (**Table S1**), similar  
103 to behavior documented for sensitized female rats [17]. Together, these observations suggested  
104 that we could indeed capture the transition from the possibly antagonistic pup-naïve state to  
105 robust pup affiliation between postnatal days 1 and 3 in this continuous-exposure paradigm.

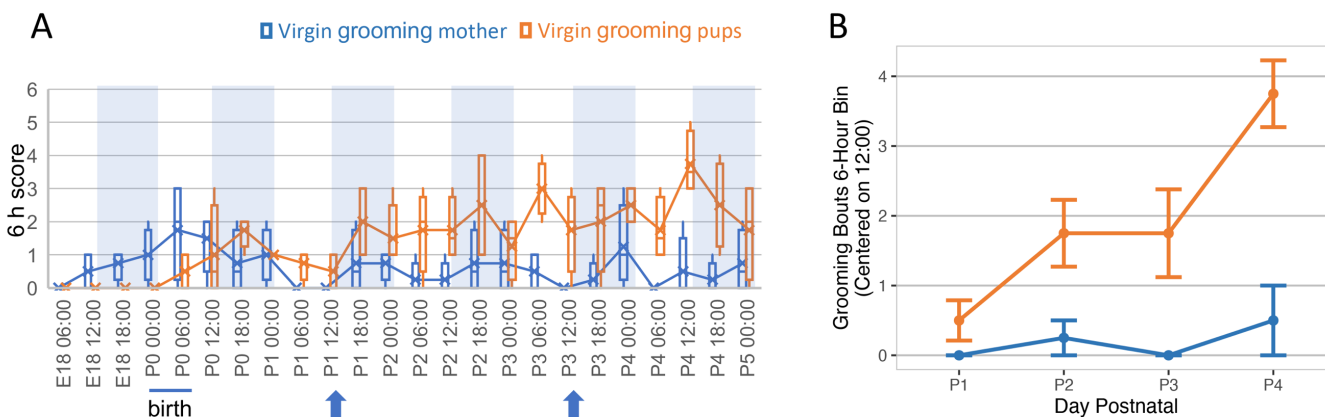

106

107

108

109

110

111

**Figure 1. Behaviors exhibited by virgin females co-housed with new mothers and pups over six days beginning the day before birth. (A)** Four cages of co-housed mothers and virgin females were recorded over a period of several days before and after birth and grooming behaviors (virgins to pups, plotted in orange; or virgins to mother, blue) were scored (0 or 1) in 5-minute intervals at the beginning of each hour from 12:00 am (0:00) the day before the birth (E18) through the end of the fourth postnatal day (P4), then scores were summed over 6 h periods. To generate the graph, 6 h summed scores were plotted for the four cages as box-and-whisker plots. Times shown mark the end of each 6h period scored. Blue shading in each plot shows the “lights out” periods (12 h beginning at 12:00 pm) for each day. All pups were born within a 6-hour period at the beginning of the light phase on the day designated as P0 for that particular cage, as marked with a bar below each graph. Behaviors plotted and colors used are shown above each graph. Blue arrows below each graph show the times of day that samples were taken from similarly co-housed pairs for gene expression and chromatin analysis. **(B)** The frequency with which co-housed virgins groomed pups (plotted in orange) increased significantly over days ( $p=0.003$ ), as illustrated by a plot focused on 12:00 pm (start of lights out), while the frequency with which virgins groomed mothers (blue) did not change. Values plotted are mean  $\pm$  standard error.

112

113 **Hormone- and neurotransmitter-related genes are dynamically expressed throughout the**

114 **virgin brain during the first three days of pup interaction.** To understand the functional

115 genomic underpinnings of this behavioral transition, we collected RNA from the brains of five

116 virgin females co-housed with a pregnant dam at each of three time points: before birth (2 hr into

117 the dark period of embryonic day 18, or E18) and at the same time during postnatal day 1 (P1)

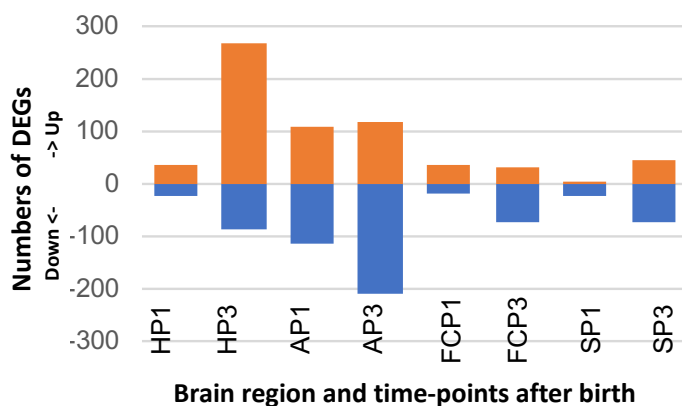

**Figure 2. Numbers of genes up- (orange) or down- (blue)-regulated in brains of pup-exposed compared to non-exposed virgin females over time.** Numbers represent all genes identified as differentially expressed at  $fdr \leq 0.05$  in each set of pairwise comparisons. H=hypothalamus; A=amygdala; FC=frontal cortex; S=striatum; P1=postnatal day 1, P3=postnatal day 3.

118 and P3. We collected and sequenced RNA from four brain regions involved in pup response,  
119 aversion, affiliation, and reward: hypothalamus, amygdala, striatum, and frontal cortex.

120 At P1, we saw an intense transcriptomic response in amygdala with very little expression  
121 change in other brain regions; by P3, relatively large numbers of differentially expressed genes  
122 (DEGs) were detected in both amygdala and hypothalamus (**Fig. 2; Table S2**). The  
123 transcriptomic response did not correlate simply with expression of immediate early genes  
124 (IEGs) such as *Fos*, which is classically used to mark neuronal activity [18]. However, the IEG  
125 *Npas4*, which has been implicated specifically in social recognition [19] and reward-related  
126 behaviors [20], was upregulated at P3 in all brain regions tested (**Fig. 3**). Focusing first on the  
127 hypothalamus, genes encoding neuropeptide hormones oxytocin (*Oxt*) and prolactin (*Prl*) were  
128 first up-regulated at P3, when the virgins were beginning to consistently display maternal  
129 behaviors (**Fig. 1, Fig. 3**); these hormones are central to initiation of maternal response in both  
130 mothers and alloparenting virgins [12,21,22]. At P1, dopaminergic (DA) signaling components  
131 including *Drd1* were down-regulated along with related Gene Ontology (GO) and functional  
132 categories such as morphine addiction and behavioral despair. However, *Drd1* returned to pre-  
133 exposure levels in hypothalamus at P3, at the same time that genes related to the activity of  
134 dopaminergic neurons were significantly up-regulated.

135 Therefore, a switch from repressed to increased dopamine-related gene expression was  
136 coordinated with the increase of *Oxt* and *Prl* expression in the hypothalamus. This pattern is  
137 similar to that observed in mothers at the time of birth and is consistent with the role of DA  
138 signaling in OXT and PRL release [23,24]. It is also consistent with recent observations from  
139 single-cell sequencing that show DA neurons in the hypothalamic preoptic area to be activated in  
140 maternally behaving animals [25]. The data suggested that a shift to a neuropeptide and



141 neurotransmitter environment favoring stable maternal behavior was developing in the  
142 hypothalamus at P3, concomitant with increased expression of alloparenting behaviors in the  
143 virgin mice. Furthermore, in light of the hypothesized role of histone modifications on maternal  
144 behavior [16,26,27], it is also worth noting the low-level but coordinated up-regulation of genes  
145 encoding chromatin remodeling and binding proteins (*Hdac10*, *Hdac7*, *Sirt6*, and *Sirt7*, *Kmt5c*,  
146 *Smarcd3*, *Atrx*, *L3mbtl1*) which we observed in the virgin hypothalamus at P3. This coordinated  
147 shift suggested the existence of a subtle but significant epigenetic response in the hypothalamus  
148 around or before that time (**Table S2A**).

149         In striking contrast to hypothalamus, components of DA signaling were coordinately *up-*  
150 *regulated* in the amygdala at P1, along with genes encoding endogenous opioids, proenkephalin  
151 (*Penk*), and prodynorphin (*Pdyn*). The combined up-regulation of these genes led to P1  
152 enrichment of multiple functional categories indicating that the virgin females were experiencing  
153 stress and anxiety during the first day after the birth of the pups (**Fig. 3; Table S3**). At P3, many  
154 of the anxiety-related amygdala DEGs had returned to pre-exposure levels or were down-  
155 regulated compared to E18 controls, suggesting that the initial P1 surge of transcription for these  
156 genes might be actively silenced. At the same time that the surge of anxiety-related genes was  
157 suppressed, the GO biological process category “maternal behavior” was identified as being  
158 enriched in P3 up-regulated genes (**Fig. 3**).

159

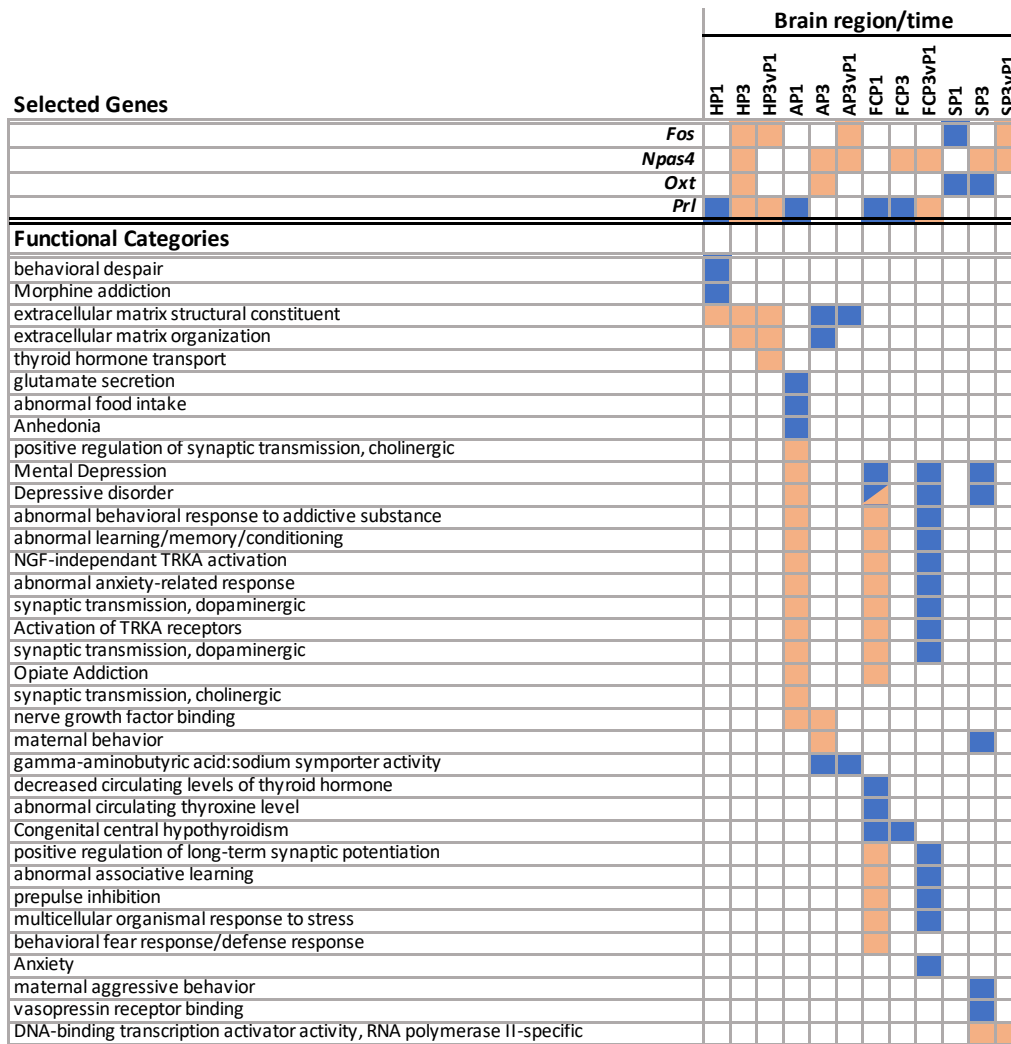

160

**Figure 3. Enrichment of differentially expressed genes in functional categories.** Differentially expressed genes (identified at  $fdr \leq 0.05$  and with absolute value of fold change  $\geq 1.5$ ) were used to identify enriched functional categories using the ToppCluster tool (Kaimal et al., 2010), as described in Methods. Top panel shows differential expression levels for selected genes, as described in the text. Categories shown are a representative subset of the full report included in Table S3, with up- or down-regulation and category enrichment levels displayed as a heat map. Colored cells denote up- (orange) or down-regulation (blue) for Selected Genes (top panel) or Functional Categories (lower panel) in each brain region/time.

161

162

Frontal cortex tracked the amygdala closely in terms of DEGs, direction of change, and

163

enriched functional categories, with a few notable exceptions. In particular, genes related to

164

thyroid hormone activity were uniquely downregulated in the virgin frontal cortex at P3, a

165

finding that is especially interesting given the known role of thyroid hormone in maternal care

166

[28]. Furthermore, in addition to the dopamine-related genes similarly up-regulated in amygdala

167 and cortex (**Table S2**), a second cadre of genes associated with depressive states, but related to  
168 abnormal thyroid hormone signaling, were down-regulated; the result was that depression-related  
169 functional categories were both up and down-regulated in the frontal cortex DEG set (**Fig. 3**;  
170 **Table S3**).

171 Finally, in P3 striatum, down-regulated categories were centered on neuropeptide-related  
172 genes including those encoding vasopressin receptor (*Avpr1a*) and prolactin receptor (*Prlr*)  
173 (**Fig. 3**). On the other hand, the gene encoding neuropeptide cholecystinin (*Cck*), which  
174 positively regulates striatal dopamine signaling in *Drd2*-expressing neurons [29,30] was up-  
175 regulated in striatum at P3 compared to P1. This event is notable, since *Cck* plays a critical role  
176 in the postnatal maintenance of maternal behaviors [31] and mediates responses to anxiety and  
177 reward [32,33]. Together these data indicated that a transcriptomic signature consistent with a  
178 “maternal response” - as it is classically defined by neuropeptide and neurotransmitter gene  
179 expression -was observed in the virgin mice beginning around P3. In particular, the P1 burst of  
180 anxiety-related genes was down-regulated to pre-exposure levels in amygdala and frontal cortex  
181 by this time. In contrast with this response in amygdala, DA signaling was *down-regulated* at  
182 P1, then *up-regulated* at P3 in the hypothalamus of the pup-exposed virgins, concordant with the  
183 onset of maternal behaviors in those mice.

184

### 185 **Comparison to published datasets.**

186 ***Parallels to gene expression in brains of new mothers.*** As referenced above, expression of  
187 several key markers that have been identified in new mothers was also observed in the  
188 alloparenting virgins at the P3 time point. An obvious next question was whether and how gene  
189 expression aligned more globally between maternal and alloparenting virgin brains. Most

190 published maternal datasets were generated with distinct hypotheses and biological questions in  
191 mind, investigating brain regions and time points very different from ours, complicating direct  
192 comparisons. Nevertheless, two published data series warrant some discussion.

193 In the first series, Gammie and colleagues used microarrays to compare gene expression  
194 between virgins (not exposed to pups) and nursing females at P7, after maternal behaviors have  
195 been robustly established [34–37]. The same group later completed a meta-analysis of their data  
196 to identify genes that were commonly dysregulated across the maternal brain. Despite the  
197 differences in methods, time points selected, and brain regions examined, we noted that DEGs  
198 identified in the meta-analysis were enriched in similar GO categories, pathways, and disease  
199 associations to those we identified as most pronounced in the pup-exposed virgin brains: neuron  
200 development, addiction, mental health disorders, and pathways involving oxytocin, vasopressin,  
201 prolactin, and opioids [38]. The similarity suggests commonalities between maternal behavior  
202 and alloparenting behavior.

203 A second published data series examined maternal gene expression over a wide range of  
204 time points pre-and post-partum including P1 and P3, and importantly, used experimental and  
205 statistical methodology very similar to ours [39]. However, cortex (neocortex in the maternal  
206 study, which includes frontal cortex and additional cortical regions) and hypothalamus were the  
207 only brain regions examined commonly in both studies. This similarity allowed us to use formal  
208 statistical techniques to measure the degree of overlap between gene sets from our study and this  
209 previously collected dataset. Using a hypergeometric test to compare gene expression in pup-  
210 exposed virgins and mothers (**Table S2B, S2C**), we found that DEGs up-regulated in the  
211 hypothalamus of P3 virgins correlated positively and most significantly with genes up-regulated  
212 in the maternal hypothalamus at P10 (**Table 1**).

213

214 **Table 1. Significant correlations between differential gene expression in specific brain**  
 215 **regions of pup-exposed virgins and new mothers, or virgins and socially challenged**  
 216 **male mice.** Hypothalamus (H), Amygdala (A), Frontal cortex (FC) and Neocortex (NC). Highest correlations for all  
 217 comparisons involving at least 3 overlapping genes are shown, for a full list of comparisons see Table S2.

| 218 | Virgin dataset/<br>219 Maternal Dataset <sup>1</sup>         | p value  | example genes                                         |
|-----|--------------------------------------------------------------|----------|-------------------------------------------------------|
| 220 | HP3-up/HP10-up                                               | 1.21E-16 | <i>Prl, En1, Slc6a3, Slc10a4, Cryab, Mif, Mfge8</i>   |
| 221 | HP3-up/HP10-down                                             | 9.12E-10 | <i>Egr1, Fos, Junb, Lamb2, Col6a1, Col6a2</i>         |
| 222 | HP3-up/HP3-up                                                | 2.16E-07 | <i>Prl, Nxp4</i>                                      |
| 223 | HP3-up/HP1-up                                                | 2.99E-07 | <i>Prl, Nxp4</i>                                      |
| 224 | HP1-up/HP10-down                                             | 1.23E-06 | <i>Magel2, Nr1d1, Slc13a4, Ogn</i>                    |
| 225 | FCP3-up/NCP1-down                                            | 1.59E-25 | <i>Arc, Fos, Npas4, Celsr3, Igsf9b, Robo3</i>         |
| 226 | FCP3-up/NCP3-down                                            | 1.06E-21 | <i>Arc, Fos, Npas4, Celsr3, Igsf9b, Robo3</i>         |
| 227 | FCP1-up/NCP1-up                                              | 9.32E-15 | <i>Gpr88, Pde10a, Ppp1r1b, Tac1, Rasd2</i>            |
| 228 | FCP3-down/NCP10-down                                         | 2.54E-11 | <i>Sgk1, Nnat, Calb2, Igsf1</i>                       |
| 229 |                                                              |          |                                                       |
| 230 | Virgin dataset/<br>231 Social challenge dataset <sup>2</sup> | p value  | example genes                                         |
| 232 | AP1-up/A120-up                                               | 3.67E-54 | <i>Drd1, Drd2, Rarb, Grp88, Ppp1r1b, Tac1, Tcf7l2</i> |
| 233 | FCP1-up/FC60-up                                              | 1.33E-48 | <i>Drd1, Drd2, Gpr88, Ppp1r1b, Rxrg, Tac1, Penk</i>   |
| 234 | AP3-down/A120-up                                             | 4.16E-36 | <i>Cdh1, Ogn, Ccn2, Igf2, Fmod, Sgk1, Grin2b</i>      |
| 235 | AP1-down/A120-up                                             | 7.16E-35 | <i>Avp, Ccn2, Grin2b, Gucy1a2</i>                     |
| 236 | FCP3-down/FC120-up                                           | 1.65E-21 | <i>Igsf1, Calb2, Nnat, Trh, Gabrq</i>                 |
| 237 | AP3-down/A120-dn                                             | 3.09E-16 | <i>Slc17a7, Tbr1, Nrn1, Sv2b, Lmo3, Tafa1</i>         |
| 238 |                                                              |          |                                                       |
| 239 |                                                              |          |                                                       |

240 The overlapping genes included several involved in DA neuron development and  
 241 function (*En1, Slc6a3* and *Slc10a4*), and neuroprotection and neuroinflammatory processes  
 242 (*Cryab, Mif*, and *Mfge8*). On the other hand, *up-regulated* hypothalamic DEGs from P3 virgins  
 243 also overlapped with genes that were *down-regulated* in the maternal hypothalamus at P10  
 244 (**Table 1**); IEGs (*Egr1, Fos*, and *Junb*) dominated this list along with genes encoding  
 245 extracellular matrix (ECM) proteins.

246 We further identified both positively and negatively-correlated overlaps in comparisons  
 247 between virgin frontal cortex and maternal neocortex. DEGs *up-regulated* in virgin frontal  
 248 cortex at P3 overlapped significantly with DEGs *down-regulated* in neocortex of mothers at P1  
 249 and P3 (**Table 1**); as in hypothalamus, this group of oppositely regulated genes was dominated  
 250 by IEGs (*Npas4, Arc*) and genes involved in ECM, and more particularly ECM proteins involved  
 251 in axon pathfinding (*Celsr3, Igsf9b, Robo3*). Interestingly, there was also significant overlap  
 252 between DEGs *up-regulated* in virgin P1 frontal cortex and P1 maternal neocortex. This cluster

253 included genes related to the anxiety-related response that, as noted above, were also up-  
254 regulated in the virgin P1 amygdala (*Adora2a, Gpr88, Pde10a, Rasd2, Ppp1r1b, Tac1, Syndig11*)  
255 (**Fig. 3; Table S2B, S2C**); this finding suggested the possibility that mothers might also  
256 experience a similar anxiety-related reaction soon after pups were born.

257 More generally, DEGs across the maternal brain showed enrichment in many of the same  
258 functional categories detected in brains of the alloparenting virgin mice [39]. Although direct  
259 comparison of the same brain regions at similar time points will be required for further  
260 clarification, the data are consistent with the idea that virgin and maternal brains activate many  
261 of the same pathways in response to pups. We note the exception of activation of IEGs and  
262 plasticity-related ECM genes to this general pattern.

263

264 ***Gene expression in P1 virgins closely parallels that of socially challenged males.*** The  
265 similarities between gene expression in mothers and the P3 virgins fits well with the fact that the  
266 virgins were beginning to exhibit maternal behaviors around this time. However, the molecular  
267 events in the virgin frontal cortex and amygdala around P1 remained something of a puzzle. We  
268 noted some similarities between DEGs in the virgin P1 amygdala and frontal cortex and DEGs  
269 previously identified in the same brain regions taken from of male mice undergoing a territory  
270 threat [40], and a hypergeometric test confirmed a very robust correlation (**Table 1; Table S2D**).  
271 DEGs up-regulated in P1 virgin amygdala -and particularly those down-regulated in P3vP1  
272 comparisons - showed especially high levels of overlap with genes up-regulated in the amygdala  
273 of the socially challenged males; frontal cortex DEGs followed a similar pattern. The  
274 overlapping amygdala genes included those associated with dopamine and cholinergic signaling  
275 (e.g. *Drd1, Drd2*) as well as a large cohort of TF-encoding genes (e.g. *Rarb, Foxp1, Neurod2,*

276 *Tcf7l2*) (**Table S2E**). The common up-regulation of these genes in the two social contexts  
277 suggests an especially important and common role. The data are consistent with the  
278 interpretation that at P1, the virgin females are experiencing emotions related to fear and threat,  
279 marked by a genomic response that is remarkably similar to that operating in the brains of males  
280 involved in territory defense. Notably, this threat-related P1 transcriptomic response was largely  
281 extinguished in the virgins at P3, as the females began to display maternal behavior toward the  
282 pups.

283

284 **DEGs cluster into network modules, suggesting regulatory factors with coordinated roles.**

285 To gain insights into the coordination and interactions of regulatory factors involved in these  
286 brain transcriptomic events, we used a weighted gene correlation network analysis (WGCNA)  
287 approach [41] to generate a co-expression network, including 25 co-expression modules  
288 connected by positive or negative links (**Fig. 4A, Table S4A-D**). DEGs from particular brain  
289 regions and time points clustered strongly within certain network modules, indicating the  
290 coordinated regulation of functionally inter-related genes (**Table S4E**). In particular, the threat-  
291 related genes that were up-regulated in the virgin amygdala at P1 and then down-regulated at P3  
292 compared to P1, were especially highly enriched in module 3, with modules 7 and 8 showing a  
293 similar but less robust enrichment pattern (**Fig. 4B**). These modules included most of the genes  
294 that were similarly expressed in P1 virgins and socially challenged males (**Table S2D**). The three  
295 positively correlated modules also included several sets of known interacting genes and DEGs  
296 with related functions. For example, Module 3 includes *Drdl* and *Penk* together with TF genes  
297 *Rarb* and *Foxp1*, both of which are important to development and activity of development of



298 dopaminergic neurons [42,43]. Module 7 includes *Drd5* and TF-encoding DEG *Tcf7l2*, which  
299 has been implicated in fear learning [44]; Module 8 includes *Drd2*, *Pdyn*, *Tac1*, and *Rxrg*, the  
300 latter encoding RARB dimerization partner, RXRG. Therefore, the DEGs cluster into modules  
301 with inter-related functions, including TFs with known regulatory interactions.

302 Other DEG classes clustered into distinct network modules. For example, genes down-  
303 regulated at both P1 and P3 clustered together, especially in Modules 4 and 6 (**Table S4E**); P3  
304 up-regulated genes clustered with especially high concentration in Module 15, including the heat  
305 shock factor regulator, *Hsf1*, a neuroprotective factor involved in adaptation to stressful  
306 experience [45]. Other modules displaying more modest levels of amygdala DEG enrichment  
307 reflect brain expression patterns that are strongly correlated with, or anticorrelated to, Modules 3,  
308 6 or 15 and might thus also include regulatory factors involved in cross-module gene activation  
309 or repressive effects (**Table S4E**).

310 To identify TFs most central to the pup response, we used GENIE3 [46] to reconstruct a  
311 gene regulatory network (GRN) with these same data (Table S5A). We then identified TFs in the

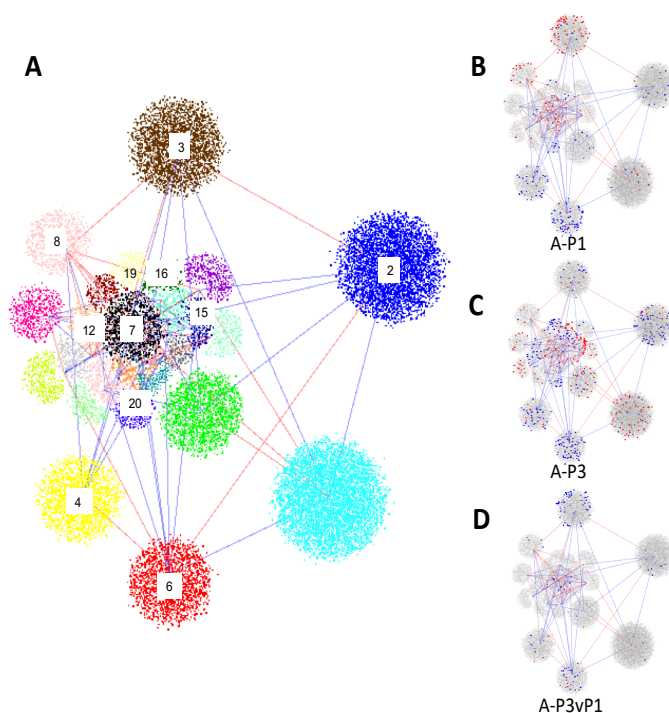

**Figure 4. Weighted gene correlation network representing gene expression in four brain regions of virgin female mice.** (A) The network, composed of genes expressed in Amygdala, Frontal Cortex, Hypothalamus, and Striatum of pup-exposed and non-exposed virgin controls, consists of 25 modules, each represented by clusters of different color and joined by lines representing positive (blue) or negative (red) eigengene correlations (in both cases showing only those correlations  $\geq 0.6$ ). Numbers have been added to label modules with particular enrichments in amygdala (A) DEGs as referred to in the text. (B-D) representations of the same network but showing the module membership of up- (blue dots) or down-regulated (red dots) DEGs identified in P1 v E18 (A-P1, B), P3 v E18 (A-P3, C), or P3vP1 (A-P3vP1, D) transcriptomic comparisons. Full details of network structure, membership and correlations are provided in Table S4.



312 network with target gene sets that were most highly enriched in DEGs from each brain region  
313 and time point (**Table S5B-E**). The data pointed clearly to Module 3 TF *Rarb* as the most  
314 central TF in the amygdala P1 transcriptomic response, whereas Module 6 TF genes *Foxc2*,  
315 *Osr1*, and *Prdm6*, all three of which are down-regulated in P3 amygdala, dominated the  
316 amygdala P3 transcriptomic response (Table S5B); brain functions of these Module 6 TFs are not  
317 known. Module 15 TF gene *Hsfl*, which is itself up-regulated in hypothalamus at P3, was the  
318 most highly associated with DEGs in that brain region and time point (Table S5C). Of potential  
319 interest, *Snape4*, a module 15 TF that activates expression of small nuclear RNAs [47,48]  
320 figured prominently in hypothalamus at both time points, suggesting a role for regulation of  
321 RNA splicing in the hypothalamic response.

322

### 323 **A dramatic shift in chromatin landscape during the long-term nurturance experience.**

324 ***Dynamic changes in amygdala chromatin at the P3 time point.*** The behavioral adaptations that  
325 follow maternal and alloparenting experiences have long been thought to involve epigenetic  
326 factors [23,26]. We therefore expected that histone modifications could play a key role in the  
327 virgins' transition to maternal care. In particular, we hypothesized that the key genes involved in  
328 the threat reaction we observed at P1 might be actively silenced by these mechanisms as the  
329 virgins began to display maternal behaviors at P3. We tested this hypothesis by carrying out  
330 chromatin immunoprecipitation (ChIP) in chromatin from each of the four brain regions from  
331 virgin females co-housed with mothers at E18 and P3. For these ChIP experiments, we used an  
332 antibody specific to histone 3 acetylated at lysine 27 (H3K27Ac), a general marker for accessible  
333 chromatin [49]).

334 Consistent with our previous results [40], the ChIP profiles revealed tens of thousands of  
335 open-chromatin peaks in every brain region for both pup-exposed and non-exposed females  
336 (**Table S6**). Since differentially accessible peaks (DAPs) offer a unique window into chromatin  
337 dynamics that may drive the brain response, we paid special attention to DAP regions – defined  
338 as genomic regions in which the relative levels of H3K27Ac were at least two-fold higher or  
339 lower in brains collected at P3 compared to E18 consistently in biological replicate samples at  
340  $FDR < 0.05$  (**Table S7**). Surprisingly although peaks were identified in similar numbers overall  
341 in the each of the four brain regions, DAPs were virtually absent in the chromatin samples from  
342 hypothalamus at P3 and were found in relatively low numbers in frontal cortex and striatum at  
343 this time point as well. In striking contrast, chromatin from the P3 amygdala contained thousands  
344 of DAPs, either increased (5325 DAPs) or decreased in accessibility (7209 DAPs) at P3  
345 compared to E18 (**Fig. 5A, Table S7A**). To maximize the chances of linking DAPs to specific  
346 DEGs, we focused our attention on the smaller number of DAPs located within 5 kb of the TSS  
347 of an annotated gene (called TSS-DAPs). Altogether we found 2738 TSS-DAPs with decreased  
348 H3K27Ac at P3 compared to E18 abbreviated hereafter as P3-closed DAPs), and 1040 TSS-  
349 DAPs with increased levels of H3K27Ac accumulation at P3 compared to E18 (P3-open DAPs).  
350 Interestingly, all genes associated with P3-open or P3-closed TSS-DAPs, respectively, clustered  
351 into network modules that were also enriched for up- or down-regulated DEGs. For example,  
352 amygdala P3-closed DAPs were particularly enriched for linkage genes in modules 3 and 6,  
353 whereas P3-open DAPs were most likely to be associated with genes in Modules 7 and 8 (**Table**  
354 **S4F**). The TSS-DAPs were associated with 138 amygdala DEGs, including 22 TSS containing  
355 P3-open DAPs, 115 TSS containing P3-closed DAPs, and 1 TSS hosting DAPs of both types  
356 (**Table S6B**). Given that amygdala DEGs were up-and down-regulated in roughly equal numbers

357 (Fig. 2) the preponderance of down-regulated genes in TSS-DAPs suggested that alterations in  
 358 the chromatin landscape at P3 were primarily focused on silencing amygdala genes. The DEGs  
 359 associated with P3-closed DAPs were enriched specifically and significantly in network module  
 360 3 (hypergeometric  $p = 2.57E-17$ ), suggesting an especially important role for histone de-  
 361 acetylation in silencing this coregulated cluster of threat-associated genes.

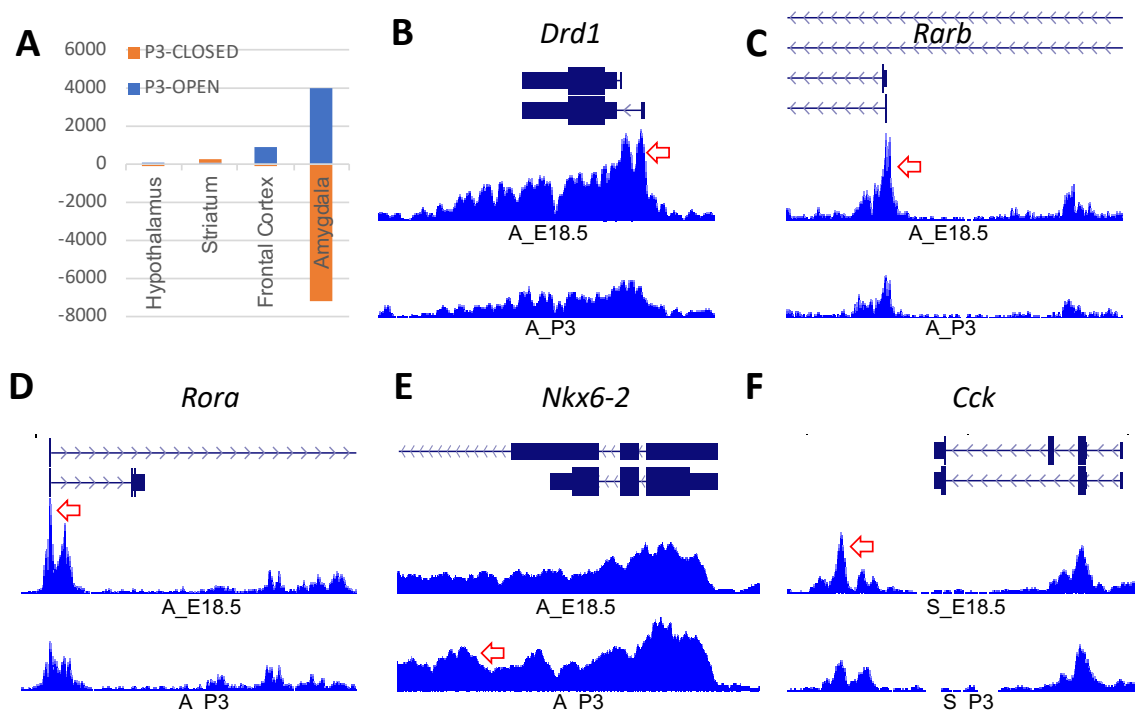

362  
 363 **Figure 5. Dramatic changes in the amygdala chromatin landscape accompanies the transition to**  
 364 **maternal-like behaviors in alloparenting virgin mice.** (A) Relative numbers of TSS-associated differentially  
 365 accessible peaks (DAPs), as measured by >2-fold change in detected levels of H3K27Ac, in the four brain  
 366 regions tested in this study. Positive numbers represent peaks more accessible at P3 than E18 (P3-open  
 DAPs); negative numbers represent less accessible (P3-closed) peaks. (B-E) Examples of DAPs in *Drd1*, *Rarb1*,  
*Rora*, and *Nkx6-2* genes, showing normalized H3K27Ac profiles in amygdala chromatin at E18 (A\_E18, top  
 track) and P3 (A\_P3, bottom track) for each gene. (F) An example of a DAP in chromatin from Striatum (S\_E18,  
 S\_P3) within the *Cck* gene. Red arrows in each panel point to examples of significant differentially accessible  
 peaks. Full ChIP profiles are available online as a UCSC Browser track hub at  
<https://trackhub.pnri.org/stubbs/ucsc/public/allo.html>, and data are available in Tables S5 and S6.

367 Examples include amygdala P3-closed DAPs associated with TSS of Module 3 genes,  
 368 *Drd1* and *Rarb* (Fig 4B, 3C), P3-closed DAPs associated with the primary alternative promoter  
 369 of *Rora* (Module 6 TF gene down-regulated at both P1 and P3) (Fig. 4D), and P3-open DAPs  
 370 associated with *Nkx6-2* (Module 1 TF gene up-regulated at the P3 timepoint) (Fig. 4E).

371 Together the data suggest that activities of many key genes involved in pup response are  
372 regulated by differential chromatin accessibility, specifically in the amygdala.

373 Although much smaller in numbers, some DAPs associated with DEGs in other brain  
374 regions also deserve some mention. For example, *Rarb* was also down-regulated in frontal cortex  
375 P3 vs. P1 comparisons, and displayed a pattern of DAPs in cortex very similar to that seen in  
376 amygdala (**Table S6A**). Additional DAPs that may be relevant to gene expression were  
377 discovered in brain regions other than amygdala by lowering the fold-change cutoff to 1.5  
378 instead of 2 (1.5X vs 2X), while keeping the same replicate FDR significance threshold ( $FDR <$   
379  $0.05$ ). For example, a 2X P3-open DAP in striatal chromatin was identified approximately 25  
380 Kb downstream of *Cck*, and several 1.5X P3-closed DAPs were found within and closer to the  
381 gene (**Table S6A; Fig. 4F**). Since *Cck* was up-regulated in striatum at P3, this chromatin  
382 configuration suggests the possible role for chromatin dynamics in the regulation of this critical  
383 gene.

384 ***Enrichment of binding motifs points to mechanistic insights.*** To obtain further information  
385 regarding the potential activity of TFs in the pup response, we searched for enrichment of known  
386 TF binding motifs (TFBMs) in the P3-open and P3-closed amygdala TSS DAPs. The search  
387 identified REST/NRSF binding motifs as the top enrichment within *P3 closed* TSS-DAPs (E18  
388 enriched compared to P3); although *Rest* itself was not identified as differentially expressed, the  
389 data suggest that REST TFBMs were being closed between E18 and P3 in amygdala of the pup-  
390 exposed virgins. This finding is of interest, because REST is a central regulatory of neuron  
391 differentiation and plasticity [50], and also plays a role in stress resilience in adult brain [51].  
392 The search also identified enrichments for motifs in the P3-closed DAPs that are recognized by  
393 TFs encoded by amygdala DEGs, including P3 down-regulated genes *Mef2c* and *Rora* (Table

394 S2). Consistent with their expression, the TSS of both genes were associated with P3-closed  
395 DAPs (**Fig. 4D**; **Table S7B**). Together these data indicate that histone deacetylation events  
396 evident at P3 serve to not only reduce levels of *Mef2c* and *Rora* gene expression, but  
397 simultaneously, to reduce the accessibility of both TFs to their target genes. Notably, both TF  
398 genes have been associated with deficits in social behavior [52–54] and *Rora* has been  
399 implicated in maternal behavior specifically [55], supporting a functional role. Notably, *Mef2c*  
400 target genes predicted by GRN analysis were significantly and specifically enriched in pup-  
401 driven DEGs in amygdala; MEF2C target genes were also predicted to include a notably high  
402 number of other TFs (Table S5B). These data suggest that MEF2C may play a role as one of the  
403 central hubs coordinating the amygdala transcriptomic response.

404 Some notable TFBM enrichments were also detected in P3-open DAPs. For example, we  
405 noted enrichment of FOX family TFs including the specific TFBM of the protein encoded by  
406 DEG, *Foxp1* which was up-regulated in amygdala at P1, then down-regulated between P1 and P3  
407 (**Table S7**). However, this FOX motif could potentially also be recognized by other family  
408 members including FOXC2; *Foxc2* was down-regulated in the P3 amygdala and was predicted in  
409 the GRN to be central to the P3 response (Table 3). Because we did not measure chromatin at  
410 P1, the initial timing of these epigenetic events is not discernible. However, the data suggest that  
411 while TSS-linked targets of REST, RORA and MEF2C became less accessible, targets of FOX  
412 family proteins became more accessible via epigenetic modifications during the postnatal period.

413

## 414 **DISCUSSION**

415 With the goal of understanding molecular mechanisms that underlie the transition to  
416 maternal behaviors, we investigated the behavioral, transcriptomic, and epigenomic response of

417 virgin females as they were co-housed with mothers and newborn pups over a period of several  
418 days. A recent study used this same paradigm to show that alloparenting virgins are instructed in  
419 pup care by co-housed mothers [12], and we observed a very similar pattern of behaviors in the  
420 mothers and virgins we tested here. Along the way, although virgin female mice did not display  
421 an obvious aversion toward the pups, we also observed evidence of an initial antagonism during  
422 the first two postnatal days; these antagonistic behaviors gave way to increasing levels of  
423 attention to the pups, with the virgins increasingly licking, grooming and huddling over the pups  
424 by postnatal day 3.

425         The data presented here reveal a dramatic and dynamic neurogenomic shift that coincides  
426 with successful maternal instruction and the activation of oxytocin neurons in the virgin brain.  
427 In particular, at P1 we observed a striking signal of fear and anxiety in the virgin hypothalamus,  
428 frontal cortex and especially in the amygdala, in the form of a gene expression pattern that  
429 correlated with high significance to that observed in territory-challenged males [40]. Despite the  
430 lack of obvious aversion, these data indicate that indeed - at least within this co-housed paradigm  
431 - virgin female mice do initially perceive the pups as anxiety-inducing, or even possibly  
432 threatening. If the threat signal is related to the aversive response observed in rats and other  
433 species, the data would be consistent with the hypothesis that pup aversion and defensive  
434 behaviors share a common brain circuitry [4], and would suggest a shared molecular mechanism  
435 for diverse types of threat response as well. Several TF genes implicated by gene expression,  
436 network co-expression, chromatin analysis, and/or motif-enrichment analysis were similarly up-  
437 or down regulated in the pup-exposed virgins and socially challenged males, suggesting crucial  
438 roles for these TFs in regulating this shared molecular signature of social threat.

439 Published data support the roles of several of these TFs in threat/anxiety response. For  
440 example, the RARB:RXRG dimer's activities in amygdala have been linked to expression of  
441 anxiety-related phenotypes [56], and *RORA* is associated with enhanced fear response in humans  
442 [57] and mice [58]. Furthermore, *Rora* mutant mouse mothers do not retrieve, care for, or suckle  
443 their young [59]; the data presented here support further investigation of this gene's role in  
444 maternal amygdala. Furthermore, other TF genes implicated in the shared threat signature are  
445 associated with social-behavior phenotypes, including *Tcf7l2*, which is up-regulated in the  
446 amygdala of virgins at P1 as well as in socially challenged males [40] and is important for fear-  
447 learning and adaptation [44]. Our data suggest that these TFs have coordinated roles in the fear  
448 response, with *Rarb* playing a central role.

449 We hypothesize that these and other networked TFs work together to modulate the  
450 response to pups, and the networks developed from our dataset suggests a robust framework of  
451 positive and negative gene interactions that coordinate this behavioral switch over time. The  
452 expression of the threat-related TF genes was extinguished along with the pulse of dopamine  
453 signaling after the rise of oxytocin, prolactin, and other neuropeptides by P3, paving the way for  
454 a shift in the virgin females' behavior toward the pups; we surmise that this shift was driven, at  
455 least in part, by a substantial level of chromatin remodeling in the amygdala. Many of the genes  
456 that returned to normal expression levels between P1 and P3 in amygdala were associated with  
457 differentially accessible chromatin, consistent with their active epigenetic silencing in that brain  
458 region at P3.

459 Chromatin remodeling has been implicated in the development of maternal behaviors in  
460 both mothers and alloparenting virgins, although most published studies have focused on the  
461 hypothalamic MPOA as the primary site of this epigenetic response [16,26,60]. These studies

462 have shown that *suppression* of HDAC activity – and thus *inhibition* of chromatin silencing - in  
463 hypothalamus is key to driving the females' maternal response. Surprisingly therefore, we found  
464 no evidence of chromatin remodeling in the P3 hypothalamus, and the massive chromatin  
465 remodeling we did observe in amygdala was weighted toward *de-acetylation*, or chromatin  
466 closure, along with the silencing of differentially expressed genes. These findings would suggest  
467 that HDAC activity plays a positive role in the acquisition of maternal behavior, although it is  
468 certainly possible that histone deacetylation at earlier time points or in different brain regions  
469 could have been crucial. For example, although deacetylation in amygdala may be critical in  
470 quenching the threat response once established, *suppression* of deacetylation in hypothalamus  
471 (and/or other brain regions) before P1 might have prevented the establishment of the  
472 aversive/fear response in the first place. Possibly relevant to this hypothesis is the coordinated  
473 up-regulation of histone deacetylase and chromatin remodeling genes we detected in the  
474 hypothalamus at P3; this signal could reflect the trace of earlier epigenetic events associated with  
475 the expression of fear and anxiety in the virgins before they transitioned to active pup care.

476         This is the first study to investigate global gene expression in the amygdala in the context  
477 of alloparental care, and supports the idea of including amygdala in future studies with mothers  
478 as well. Our studies highlight a special role for the amygdala in the switch to alloparenting  
479 behavior in this context, a hypothesis that is consistent with the known functions of amygdala in  
480 maternal behavior and bonding [61,62]. As underscored by human brain imaging studies,  
481 maternal behavior involves a global brain response that unfolds over an extended period of pre-  
482 and postnatal time [63]; in the pup-exposed virgins, we detected just the start of this behavioral  
483 transition during the third postnatal day. Nevertheless, the mechanisms involved in this  
484 transition to intensive pup care could be relevant to a successful transition to motherhood as well.



485 Although it is not yet possible to determine whether a similar response is activated, or actively  
486 suppressed, at some time around birth in the maternal amygdala, this question is an important  
487 one in the context of maternal bonding and infant care. Especially given the similar up-  
488 regulation of anxiety-related genes we identified in published data from the maternal neocortex,  
489 we speculate that a similar active suppression of a threat/anxiety program may occur in the  
490 amygdala of new mothers, and that dysregulation of this program could underlie the failure of  
491 mother-infant bonding, post-partum anxiety and depression. Addressing this hypothesis will  
492 offer a novel perspective on the causes of these very common, painful and highly consequential  
493 human maladies.

494

## 495 **MATERIALS AND METHODS**

### 496 **Mice and behavioral analysis**

497 All work with mice was done under the approval of the IACUC at the University of Illinois,  
498 Urbana Champaign. Mice were housed in a temperature-controlled room in a reverse 12h/ 12h  
499 light-dark cycle. Six-week-old female mice (C57BL/6J x C3HJ F1 hybrids, with an agouti coat  
500 to allow clear distinction with the black-coated virgins) purchased from the Jackson Laboratory  
501 were impregnated, and co-housed with age-matched virgin female C57BL/6J mice during  
502 pregnancy and through the early post-partum pregnancy. To record behavior, four pairs were  
503 filmed in clear-topped cages continuously using a Samsung SCB-2000 CCTV Camera with iSpy  
504 64 v7.2.1.0 CCTV software. Behavior was scored in each cage (0 or 1) in 5-minute snapshots at  
505 the top of each hour from the day before and until the end of the fourth day after birth, with

506 scores combined over 6 h periods for each cage to generate the illustrative plot in Fig. 1. To test  
507 the hypothesis that pup-grooming behaviors increased over time, while mother-grooming  
508 behaviors did not, we performed one-way repeated measures ANOVA in R (v4.0.4) using the  
509 rstatix package (v0.7.0). The `anova_test()` function in rstatix automatically assesses repeated  
510 measures data for the assumption of sphericity. Scores for these and other behaviors are also  
511 presented in Table S1. The 5-minute video snapshots are provided as File S1 with video clips of  
512 specific and unusual behaviors noted in the text provided as File S2; additional video is available  
513 on request.

#### 514 **Dissections and RNA preparation**

515 Dissections were performed as described in detail previously [40] with the addition of the  
516 striatum. Briefly, mice were euthanized by cervical dislocation followed by rapid decapitation.  
517 Their brains were removed and sectioned in a coronal slicing mouse brain matrix. A total of  
518 three cuts were made: two cuts separated by 4 mm defined by the rostral and caudal aspects of  
519 the hypothalamus and a third cut bisecting these two cuts. The hypothalamus, frontal cortex,  
520 striatum, and amygdala were dissected from the resultant brain slices (**Supplementary Figure**  
521 **S1**). Upon completion of these dissections, focal brain regions were placed into cryotubes, snap-  
522 frozen in liquid N<sub>2</sub>, and stored at -80°C until downstream processing. Samples were prepared for  
523 sequencing from the four dissected brain regions of five mice per condition (E18, P1, P3). RNA  
524 isolation and QC were completed as described previously, with libraries prepared robotically at  
525 the Roy J. Carver Biotechnology Center at University of Illinois, also as described in [40].

#### 526 **Gene expression analysis**

527 Illumina sequencing libraries were generated with the TruSeq Stranded mRNA HT kit (Illumina)  
528 using an Eppendorf ePMotion 5075 robot and were sequenced to a depth 45-60 million reads per  
529 sample on Hi-Seq 2500 instruments at the Roy J. Carver Biotechnology Center at the University  
530 of Illinois. All sequencing data generated in this study have been deposited to the GEO database  
531 under Accession number GSE184549. Pairwise comparisons of E18, P1 and P3 samples were  
532 completed as previously described in detail [40], with results provided in Table S2. For  
533 functional analysis, genes that were found to be differentially expressed at  $fdr < 0.05$  were first  
534 filtered for absolute fold change  $>1.5$ , and uploaded to the TopCluster web analysis tool [64]  
535 using default conditions (Bonferroni correction,  $fdr < 0.05$ ). Selected categories are summarized  
536 in Table 2, with full TopCluster Results reported in Table S3.

### 537 **Network Analysis**

538 We used signed WGCNA (Langfelder & Horvath, 2008) to generate networks from the data  
539 from all individuals, brain regions, and time points, as described in depth in our previous study  
540 [40]. Eigengenes calculated for each module were used to generate module correlations; details  
541 of module structure, module gene content, eigengene correlations, and hypergeometric  
542 enrichments are presented in Table S4. After log-transforming our data using voom+limma, we  
543 filtered zero variance genes, selected a soft thresholding coefficient of 3, then used a signed  
544 Pearson correlation analysis with a minimum module size of 30. Images in Figure 3 were  
545 generated using version 3.7.1 of Cytoscape [65].

546 To reconstruct the GRN, we obtained a list of 1523 potential transcription factors in mouse from  
547 Animal Transcription Factor Database [66]. GENIE3 [46] was applied on the expression data of  
548 37991 genes in 53 conditions consisting of various brain regions (H=hypothalamus,

549 A=amygdala, FC=frontal cortex, and S=striatum) and different time points (E18, P1-P3) to score  
550 the relative significance of each TF-gene interaction. (Auto-regulatory relationships were  
551 excluded). To construct a GRN, for each gene we collected up to top five TF regulators of that  
552 gene as predicted by GENIE3, additionally requiring that the TF-gene pair have a Spearman's  
553 correlation of at least 0.5 (in absolute value) and a GENIE3 score of at least 0.005. The resulting  
554 GRN included 92717 interactions involving 1400 unique TFs and 21156 genes (Table S5A). To  
555 assess the significance of TF regulons in different brain regions, for each TF we computed the  
556 enrichment of its regulon (gene set predicted to be regulated by the TF) for DEGs from each  
557 brain region, using hypergeometric test (Table S5B-E).

#### 558 **ChIP Tissue Preparation, Chromatin Immunoprecipitation, and Library Preparation**

559 ChIP was performed essentially as described in detail in our previous study [40]. Briefly, brain  
560 tissue dissected from 3 animals was pooled, homogenized, and fixed in PBS with 1%  
561 formaldehyde for 10 minutes. Nuclei were prepared from the fixed cells and stored at -80° C  
562 until use. Thawed nuclei were sonicated using a Biorupter™ UCD-200 (Diagenode, Liège,  
563 Belgium) sonicator, and fragmented chromatin was processed for ChIP with 2 ug histone  
564 H3K27Ac antibody per sample (Abcam ab4729), using one million nuclei for each IP. IPs were  
565 performed in biological replicate, with one pool of 3 samples in each replicate, as previously  
566 described. Libraries were prepared from eluted DNA using KAPA LTP library kits (KK8230)  
567 using Bioo Scientific index adapters, size-selected using AmpureXP beads (Beckman Coulter,  
568 Brea, CA, USA) and quality checked by Qubit 2.0 and Bioanalyzer (Agilent 2100). Samples  
569 were sequenced to a depth of 20-30M reads per replicate on an Illumina HiSeq 2500 sequencer  
570 using a TruSeq SBS sequencing kit, version 4, in single-end format with fragment length of 100

571 bp. Base calling and demultiplexing into FASTQ files was done using bcl2fastq v1.8.4 software  
572 (Illumina, San Diego, CA, USA).

### 573 **ChIP-Seq Bioinformatics**

574 ChIP sequencing reads were mapped with Bowtie2 [67] to the UCSC Mus musculus mm9 or  
575 mm10 genome, using default settings and analyzed for peaks using HOMER (Hypergeometric  
576 Optimization of Motif EnRichment) v4.7 [68], as previously described [40]. Differential  
577 chromatin peaks were identified in biological replicates using the HOMER  
578 getDifferentialPeaksReplicates.pl script, looking for any peaks that changed at least two-fold  
579 between conditions with an FDR cutoff of 0.05. Known motif discovery was performed with the  
580 HOMER findMotifsGenome.pl script using default settings with 201bp peak regions extracted  
581 from all histone peaks or only differential histone peaks. Chromatin profiles are available online  
582 as a UCSC Genome Browser track hub at <https://trackhub.pnri.org/stubbs/ucsc/public/allo.txt>).

### 583 **ACKNOWLEDGEMENT**

584 We thank Gene Robinson, Alison Bell, Dave Zhao for helpful discussions throughout this project  
585 and Alison Bell and Elbert Branscomb for critical comments on the manuscript. This work was  
586 supported by the Simons Foundation (#SfLife 291812), with additional funding provided by the  
587 University of Illinois and the Pacific Northwest Research Institute.



## LITERATURE CITED

- Adachi, M., Lin, P. Y., Pranav, H., & Monteggia, L. M. (2016). Postnatal Loss of Mef2c Results in Dissociation of Effects on Synapse Number and Learning and Memory. *Biol Psychiatry*, *80*(2), 140-148. doi:10.1016/j.biopsych.2015.09.018
- Aguggia, J. P., Suarez, M. M., & Rivarola, M. A. (2019). Multiparity Dampened the Neurobehavioral Consequences of Mother-Pup Separation Stress in Dams. *Neuroscience*, *416*, 207-220. doi:10.1016/j.neuroscience.2019.07.042
- Althammer, F., & Grinevich, V. (2017). Diversity of oxytocin neurons: beyond magno- and parvocellular cell types? *J Neuroendocrinol*. doi:10.1111/jne.12549
- Araujo, D. J., Anderson, A. G., Berto, S., Runnels, W., Harper, M., Ammanuel, S., . . . Konopka, G. (2015). FoxP1 orchestration of ASD-relevant signaling pathways in the striatum. *Genes Dev*, *29*(20), 2081-2096. doi:10.1101/gad.267989.115
- Atzil, S., Touroutoglou, A., Rudy, T., Salcedo, S., Feldman, R., Hooker, J. M., . . . Barrett, L. F. (2017). Dopamine in the medial amygdala network mediates human bonding. *Proc Natl Acad Sci U S A*, *114*(9), 2361-2366. doi:10.1073/pnas.1612233114
- Bridges, R. S. (2015). Neuroendocrine regulation of maternal behavior. *Front Neuroendocrinol*, *36*, 178-196. doi:10.1016/j.yfrne.2014.11.007
- Brunton, P. J. (2019). Endogenous opioid signalling in the brain during pregnancy and lactation. *Cell Tissue Res*, *375*(1), 69-83. doi:10.1007/s00441-018-2948-1
- Calemandrei, G., Keverne, E. B. (1994). Differential Expression of Fos Protein in the Brain of Female Mice Dependent on Pup Sensory Cues and Maternal Experience. *Behav Neuro*, *108*(1), 113-120.
- Damberg, M. (2005). Transcription factor AP-2 and monoaminergic functions in the central nervous system. *J Neural Transm (Vienna)*, *112*(10), 1281-1296. doi:10.1007/s00702-005-0325-1
- Damberg, M., Garpenstrand, H., Alfredsson, J., Ekblom, J., Forslund, K., Rylander, G., & Oreland, L. (2000). A polymorphic region in the human transcription factor AP-2beta gene is associated with specific personality traits. *Mol Psychiatry*, *5*(2), 220-224. doi:10.1038/sj.mp.4000691
- den Hoed, J., Sollis, E., Venselaar, H., Estruch, S. B., Deriziotis, P., & Fisher, S. E. (2018). Functional characterization of TBR1 variants in neurodevelopmental disorder. *Sci Rep*, *8*(1), 14279. doi:10.1038/s41598-018-32053-6
- Driessen, T. M., Eisinger, B. E., Zhao, C., Stevenson, S. A., Saul, M. C., & Gammie, S. C. (2014). Genes showing altered expression in the medial preoptic area in the highly social maternal phenotype are related to autism and other disorders with social deficits. *BMC Neurosci*, *15*, 11. doi:10.1186/1471-2202-15-11
- Dufford, A. J., Erhart, A., & Kim, P. (2019). Maternal brain resting-state connectivity in the postpartum period. *J Neuroendocrinol*, *31*(9), e12737. doi:10.1111/jne.12737
- Dulac, C., O'Connell, L. A., & Wu, Z. (2014). Neural control of maternal and paternal behaviors. *Science*, *345*(6198), 765-770. doi:10.1126/science.1253291
- Dulac, C., O'Connell, L. A., Wu, Z. (2014). Neural control of maternal and paternal behaviors. *Science*, *345*(6198), 765-770.

- Eisinger, B. E., Driessen, T. M., Zhao, C., & Gammie, S. C. (2014). Medial prefrontal cortex: genes linked to bipolar disorder and schizophrenia have altered expression in the highly social maternal phenotype. *Front Behav Neurosci*, *8*, 110. doi:10.3389/fnbeh.2014.00110
- Eisinger, B. E., Zhao, C., Driessen, T. M., Saul, M. C., & Gammie, S. C. (2013). Large scale expression changes of genes related to neuronal signaling and developmental processes found in lateral septum of postpartum outbred mice. *PLoS One*, *8*(5), e63824. doi:10.1371/journal.pone.0063824
- Fleming, A. S., & Rosenblatt, J. S. (1974). Maternal behavior in the virgin and lactating rat. *J Comp Physiol Psychol*, *86*(5), 957-972. doi:10.1037/h0036414
- Frederic, F., Chianale, C., Oliver, C., & Mariani, J. (2006). Enhanced endocrine response to novel environment stress and lack of corticosterone circadian rhythm in staggerer (Rora sg/sg) mutant mice. *J Neurosci Res*, *83*(8), 1525-1532. doi:10.1002/jnr.20843
- Funahashi, Y., Ariza, A., Emi, R., Xu, Y., Shan, W., Suzuki, K., . . . Kaibuchi, K. (2019). Phosphorylation of Npas4 by MAPK Regulates Reward-Related Gene Expression and Behaviors. *Cell Rep*, *29*(10), 3235-3252 e3239. doi:10.1016/j.celrep.2019.10.116
- Gammie, S. C., Driessen, T. M., Zhao, C., Saul, M. C., & Eisinger, B. E. (2016). Genetic and neuroendocrine regulation of the postpartum brain. *Front Neuroendocrinol*, *42*, 1-17. doi:10.1016/j.yfrne.2016.05.002
- Gandelman, R. (1973). Induction of Maternal Nest Building in Virgin Female Mice by the Presentation of Young. *Horm Behav*, *4*, 191-197.
- Guastavino, J. M. (1983). Constraint of the mother with pups restores some aspects of the maternal behavior of mutant staggerer mice. *Physiol Behav*, *30*(5), 771-774. doi:10.1016/0031-9384(83)90176-2
- Guisart, C., Latypova, X., Rollier, P., Khan, T. N., Stamberger, H., McWalter, K., . . . Kury, S. (2018). Dual Molecular Effects of Dominant RORA Mutations Cause Two Variants of Syndromic Intellectual Disability with Either Autism or Cerebellar Ataxia. *Am J Hum Genet*, *102*(5), 744-759. doi:10.1016/j.ajhg.2018.02.021
- Gutman, D. A., & Nemeroff, C. B. (2002). Neurobiology of early life stress: rodent studies. *Semin Clin Neuropsychiatry*, *7*(2), 89-95. doi:10.1053/scnp.2002.31781
- Haller, J., Harold, G., Sandi, C., & Neumann, I. D. (2014). Effects of adverse early-life events on aggression and anti-social behaviours in animals and humans. *J Neuroendocrinol*, *26*(10), 724-738. doi:10.1111/jne.12182
- Hamdan, F. F., Daoud, H., Rochefort, D., Piton, A., Gauthier, J., Langlois, M., . . . Michaud, J. L. (2010). De novo mutations in FOXP1 in cases with intellectual disability, autism, and language impairment. *Am J Hum Genet*, *87*(5), 671-678. doi:10.1016/j.ajhg.2010.09.017
- Harding, K. M., & Lonstein, J. S. (2016). Extensive juvenile "babysitting" facilitates later adult maternal responsiveness, decreases anxiety, and increases dorsal raphe tryptophan hydroxylase-2 expression in female laboratory rats. *Dev Psychobiol*, *58*(4), 492-508. doi:10.1002/dev.21392
- Harrington, A. J., Bridges, C. M., Berto, S., Blankenship, K., Cho, J. Y., Assali, A., . . . Cowan, C. W. (2020). MEF2C Hypofunction in Neuronal and Neuroimmune Populations Produces MEF2C Haploinsufficiency Syndrome-like Behaviors in Mice. *Biol Psychiatry*, *88*(6), 488-499. doi:10.1016/j.biopsych.2020.03.011



- Heinz, S., Benner, C., Spann, N., Bertolino, E., Lin, Y. C., Laslo, P., . . . Glass, C. K. (2010). Simple combinations of lineage-determining transcription factors prime cis-regulatory elements required for macrophage and B cell identities. *Mol Cell*, *38*(4), 576-589. doi:10.1016/j.molcel.2010.05.004
- Heslin, K., & Coutellier, L. (2018). Npas4 deficiency and prenatal stress interact to affect social recognition in mice. *Genes Brain Behav*, *17*(5), e12448. doi:10.1111/gbb.12448
- Hon, G. C., Hawkins, R. D., & Ren, B. (2009). Predictive chromatin signatures in the mammalian genome. *Hum Mol Genet*, *18*(R2), R195-201. doi:10.1093/hmg/ddp409
- Huang, T. N., Chuang, H. C., Chou, W. H., Chen, C. Y., Wang, H. F., Chou, S. J., & Hsueh, Y. P. (2014). Tbr1 haploinsufficiency impairs amygdalar axonal projections and results in cognitive abnormality. *Nat Neurosci*, *17*(2), 240-247. doi:10.1038/nn.3626
- Kaimal, V., Bardes, E. E., Tabar, S. C., Jegga, A. G., & Aronow, B. J. (2010). ToppCluster: a multiple gene list feature analyzer for comparative enrichment clustering and network-based dissection of biological systems. *Nucleic Acids Res*, *38*(Web Server issue), W96-102. doi:10.1093/nar/gkq418
- Kinsley, C. H., Bales, K. L., Bardi, M., & Stolzenberg, D. S. (2015). Reproductive experiential regulation of cognitive and emotional resilience. *Neurosci Biobehav Rev*, *58*, 92-106. doi:10.1016/j.neubiorev.2015.05.015
- Kinsley, C. H., Bardi, M., Karelina, K., Rima, B., Christon, L., Friedenber, J., & Griffin, G. (2008). Motherhood induces and maintains behavioral and neural plasticity across the lifespan in the rat. *Arch Sex Behav*, *37*(1), 43-56. doi:10.1007/s10508-007-9277-x
- Kinsley, C. H., & Bridges, R. S. (1990). Morphine treatment and reproductive condition alter olfactory preferences for pup and adult male odors in female rats. *Dev Psychobiol*, *23*(4), 331-347. doi:10.1002/dev.420230405
- Kitaoka, K., Shimizu, M., Shimizu, N., Chikahisa, S., Nakagomi, M., Shudo, K., . . . Sei, H. (2011). Retinoic acid receptor antagonist LE540 attenuates wakefulness via the dopamine D1 receptor in mice. *Brain Res*, *1423*, 10-16. doi:10.1016/j.brainres.2011.09.023
- Kombian, S. B., Ananthakshmi, K. V., Parvathy, S. S., & Matowe, W. C. (2004). Cholecystokinin activates CCKB receptors to excite cells and depress EPSCs in the rat rostral nucleus accumbens in vitro. *J Physiol*, *555*(Pt 1), 71-84. doi:10.1113/jphysiol.2003.056739
- Kombian, S. B., Ananthakshmi, K. V., Parvathy, S. S., & Matowe, W. C. (2005). Cholecystokinin inhibits evoked inhibitory postsynaptic currents in the rat nucleus accumbens indirectly through gamma-aminobutyric acid and gamma-aminobutyric acid type B receptors. *J Neurosci Res*, *79*(3), 412-420. doi:10.1002/jnr.20349
- Krzyzosiak, A., Szyszka-Niagolov, M., Wietrzyk, M., Gbaille, S., Muramatsu, S., & Krezel, W. (2010). Retinoid x receptor gamma control of affective behaviors involves dopaminergic signaling in mice. *Neuron*, *66*(6), 908-920. doi:10.1016/j.neuron.2010.05.004
- Kuemerle, B., Gulden, F., Cherosky, N., Williams, E., & Herrup, K. (2007). The mouse Engrailed genes: a window into autism. *Behav Brain Res*, *176*(1), 121-132. doi:10.1016/j.bbr.2006.09.009
- Langfelder, P., & Horvath, S. (2008). WGCNA: an R package for weighted correlation network analysis. *BMC Bioinformatics*, *9*, 559. doi:10.1186/1471-2105-9-559

- Langfelder, P., & Horvath, S. (2012). Fast R Functions for Robust Correlations and Hierarchical Clustering. *J Stat Softw*, 46(11). Retrieved from <https://www.ncbi.nlm.nih.gov/pubmed/23050260>
- Langmead, B., & Salzberg, S. L. (2012). Fast gapped-read alignment with Bowtie 2. *Nat Methods*, 9(4), 357-359. doi:10.1038/nmeth.1923
- Lepagnol-Bestel, A. M., Maussion, G., Ramoz, N., Moalic, J. M., Gorwood, P., & Simonneau, M. (2007). Nr5f silencing induces molecular and subcellular changes linked to neuronal plasticity. *Neuroreport*, 18(5), 441-446. doi:10.1097/WNR.0b013e328011dc81
- Lin, C. H., Hansen, S., Wang, Z., Storm, D. R., Tapscott, S. J., & Olson, J. M. (2005). The dosage of the neuroD2 transcription factor regulates amygdala development and emotional learning. *Proc Natl Acad Sci U S A*, 102(41), 14877-14882. doi:10.1073/pnas.0506785102
- Lonstein, J. S., Wagner, C. K., De Vries, G. J. (1999). Comparison of the "Nursing" and Other Parental Behaviors of Nulliparous and Lactating Female Rats. *Horm Behav*, 36, 242-251.
- Mann, P. E., Felicio, L. F., & Bridges, R. S. (1995). Investigation into the role of cholecystokinin (CCK) in the induction and maintenance of maternal behavior in rats. *Horm Behav*, 29(3), 392-406. doi:10.1006/hbeh.1995.1027
- Mayer, H. S., Helton, J., Torres, L. Y., Cortina, I., Brown, W. M., & Stolzenberg, D. S. (2019). Histone deacetylase inhibitor treatment induces postpartum-like maternal behavior and immediate early gene expression in the maternal neural pathway in virgin mice. *Horm Behav*, 108, 94-104. doi:10.1016/j.yhbeh.2018.02.011
- Miller, M. W., Wolf, E. J., Logue, M. W., & Baldwin, C. T. (2013). The retinoid-related orphan receptor alpha (RORA) gene and fear-related psychopathology. *J Affect Disord*, 151(2), 702-708. doi:10.1016/j.jad.2013.07.022
- Moffitt, J. R., Bambah-Mukku, D., Eichhorn, S. W., Vaughn, E., Shekhar, K., Perez, J. D., . . . Zhuang, X. (2018). Molecular, spatial, and functional single-cell profiling of the hypothalamic preoptic region. *Science*, 362(6416). doi:10.1126/science.aau5324
- Nishi, M., Horii-Hayashi, N., & Sasagawa, T. (2014). Effects of early life adverse experiences on the brain: implications from maternal separation models in rodents. *Front Neurosci*, 8, 166. doi:10.3389/fnins.2014.00166
- Noirot, M. (1972). Ultrasounds and Maternal Behavior in Small Rodents. *Dev Psychobiol*, 5(4), 371-387.
- Numan, M. (2007). Motivational systems and the neural circuitry of maternal behavior in the rat. *Dev Psychobiol*, 49(1), 12-21. doi:10.1002/dev.20198
- Ray, S., Tzeng, R. Y., DiCarlo, L. M., Bundy, J. L., Vied, C., Tyson, G., . . . Arbeitman, M. N. (2015). An Examination of Dynamic Gene Expression Changes in the Mouse Brain During Pregnancy and the Postpartum Period. *G3 (Bethesda)*, 6(1), 221-233. doi:10.1534/g3.115.020982
- Rosenblatt, J. S., Mayer, A. D., & Giordano, A. L. (1988). Hormonal basis during pregnancy for the onset of maternal behavior in the rat. *Psychoneuroendocrinology*, 13(1-2), 29-46. doi:10.1016/0306-4530(88)90005-4
- Rotzinger, S., & Vaccarino, F. J. (2003). Cholecystokinin receptor subtypes: role in the modulation of anxiety-related and reward-related behaviours in animal models. *J Psychiatry Neurosci*, 28(3), 171-181. Retrieved from <https://www.ncbi.nlm.nih.gov/pubmed/12790157>

- Russell, J. A., Leng, G., & Douglas, A. J. (2003). The magnocellular oxytocin system, the fount of maternity: adaptations in pregnancy. *Front Neuroendocrinol*, *24*(1), 27-61. doi:10.1016/s0091-3022(02)00104-8
- Sagar, S. M., Sharp, F. R., & Curran, T. (1988). Expression of c-fos protein in brain: metabolic mapping at the cellular level. *Science*, *240*(4857), 1328-1331. doi:10.1126/science.3131879
- Sarachana, T., Xu, M., Wu, R. C., & Hu, V. W. (2011). Sex hormones in autism: androgens and estrogens differentially and reciprocally regulate RORA, a novel candidate gene for autism. *PLoS One*, *6*(2), e17116. doi:10.1371/journal.pone.0017116
- Saul, M. C., Seward, C. H., Troy, J. M., Zhang, H., Sloofman, L. G., Lu, X., . . . Stubbs, L. (2017). Transcriptional regulatory dynamics drive coordinated metabolic and neural response to social challenge in mice. *Genome Res*, *27*(6), 959-972. doi:10.1101/gr.214221.116
- Savic, D., Distler, M. G., Sokoloff, G., Shanahan, N. A., Dulawa, S. C., Palmer, A. A., & Nobrega, M. A. (2011). Modulation of Tcf7l2 expression alters behavior in mice. *PLoS One*, *6*(10), e26897. doi:10.1371/journal.pone.0026897
- Sayad, A., Noroozi, R., Omrani, M. D., Taheri, M., & Ghafouri-Fard, S. (2017). Retinoic acid-related orphan receptor alpha (RORA) variants are associated with autism spectrum disorder. *Metab Brain Dis*, *32*(5), 1595-1601. doi:10.1007/s11011-017-0049-6
- Shannon, P., Markiel, A., Ozier, O., Baliga, N. S., Wang, J. T., Ramage, D., . . . Ideker, T. (2003). Cytoscape: a software environment for integrated models of biomolecular interaction networks. *Genome Res*, *13*(11), 2498-2504. doi:10.1101/gr.1239303
- Singh-Taylor, A., Molet, J., Jiang, S., Korosi, A., Bolton, J. L., Noam, Y., . . . Baram, T. Z. (2018). NRSF-dependent epigenetic mechanisms contribute to programming of stress-sensitive neurons by neonatal experience, promoting resilience. *Mol Psychiatry*, *23*(3), 648-657. doi:10.1038/mp.2016.240
- Stolzenberg, D. S., & Champagne, F. A. (2016). Hormonal and non-hormonal bases of maternal behavior: The role of experience and epigenetic mechanisms. *Horm Behav*, *77*, 204-210. doi:10.1016/j.yhbeh.2015.07.005
- Stolzenberg, D. S., & Numan, M. (2011). Hypothalamic interaction with the mesolimbic DA system in the control of the maternal and sexual behaviors in rats. *Neurosci Biobehav Rev*, *35*(3), 826-847. doi:10.1016/j.neubiorev.2010.10.003
- Stolzenberg, D. S., & Rissman, E. F. (2011). Oestrogen-independent, experience-induced maternal behaviour in female mice. *J Neuroendocrinol*, *23*(4), 345-354. doi:10.1111/j.1365-2826.2011.02112.x
- Stolzenberg, D. S., Stevens, J. S., & Rissman, E. F. (2012). Experience-facilitated improvements in pup retrieval; evidence for an epigenetic effect. *Horm Behav*, *62*(2), 128-135. doi:10.1016/j.yhbeh.2012.05.012
- Stolzenberg, D. S., Stevens, J. S., & Rissman, E. F. (2014). Histone deacetylase inhibition induces long-lasting changes in maternal behavior and gene expression in female mice. *Endocrinology*, *155*(9), 3674-3683. doi:10.1210/en.2013-1946
- Vaccarino, F. J. (1994). Nucleus accumbens dopamine-CCK interactions in psychostimulant reward and related behaviors. *Neurosci Biobehav Rev*, *18*(2), 207-214. doi:10.1016/0149-7634(94)90025-6

- Wonch, K. E., de Medeiros, C. B., Barrett, J. A., Dudin, A., Cunningham, W. A., Hall, G. B., . . . Fleming, A. S. (2016). Postpartum depression and brain response to infants: Differential amygdala response and connectivity. *Soc Neurosci*, *11*(6), 600-617. doi:10.1080/17470919.2015.1131193
- Zhao, C., Eisinger, B. E., Driessen, T. M., & Gammie, S. C. (2014). Addiction and reward-related genes show altered expression in the postpartum nucleus accumbens. *Front Behav Neurosci*, *8*, 388. doi:10.3389/fnbeh.2014.00388
- Zhu, X., Cheng, M., Peng, M., Xiao, X., Yao, S., & Zhang, X. (2008). Basal behavioral characterization of hsf1 deficient mice and its cellular and behavioral abnormalities underlying chronic unpredictable stressors. *Behav Brain Res*, *193*(2), 225-229. doi:10.1016/j.bbr.2008.05.024
